# Supplementary material for: Variation in HIV-1 Tat activity is a key determinant in the establishment of latent infection
Source: JCI journal article supplement (doi:10.1172/jci.insight.184711), 2024-12-05
Supplement: sd2 [file 2]

Supplemental Figure 4A  
Uncropped western blot

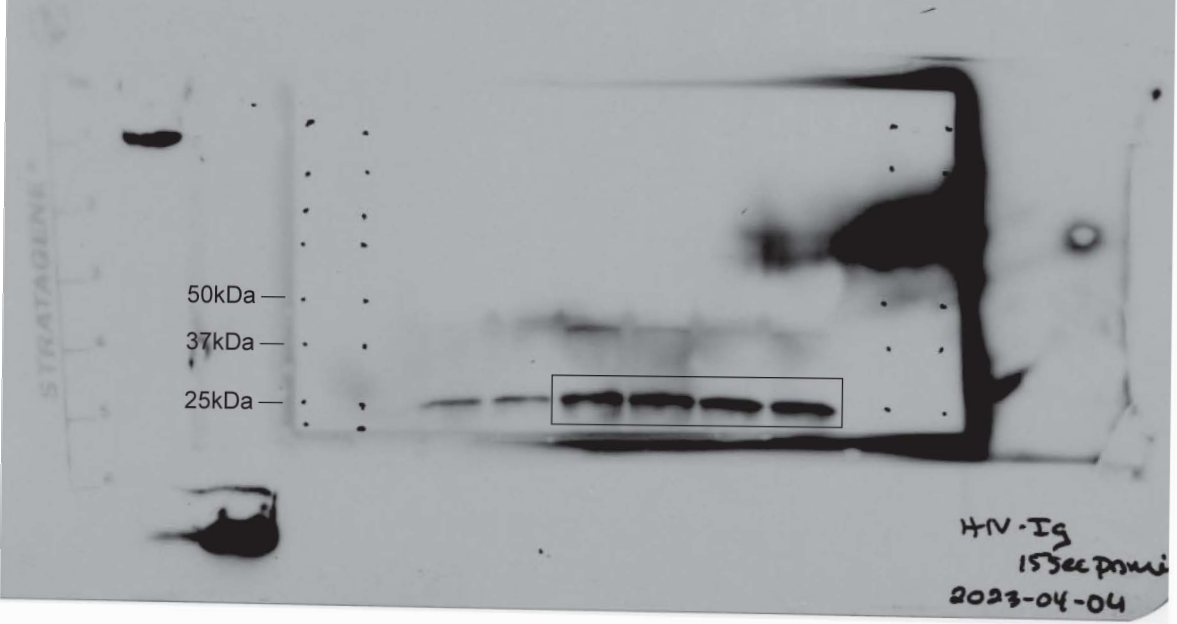

α-HIV-Ig  
gag p24

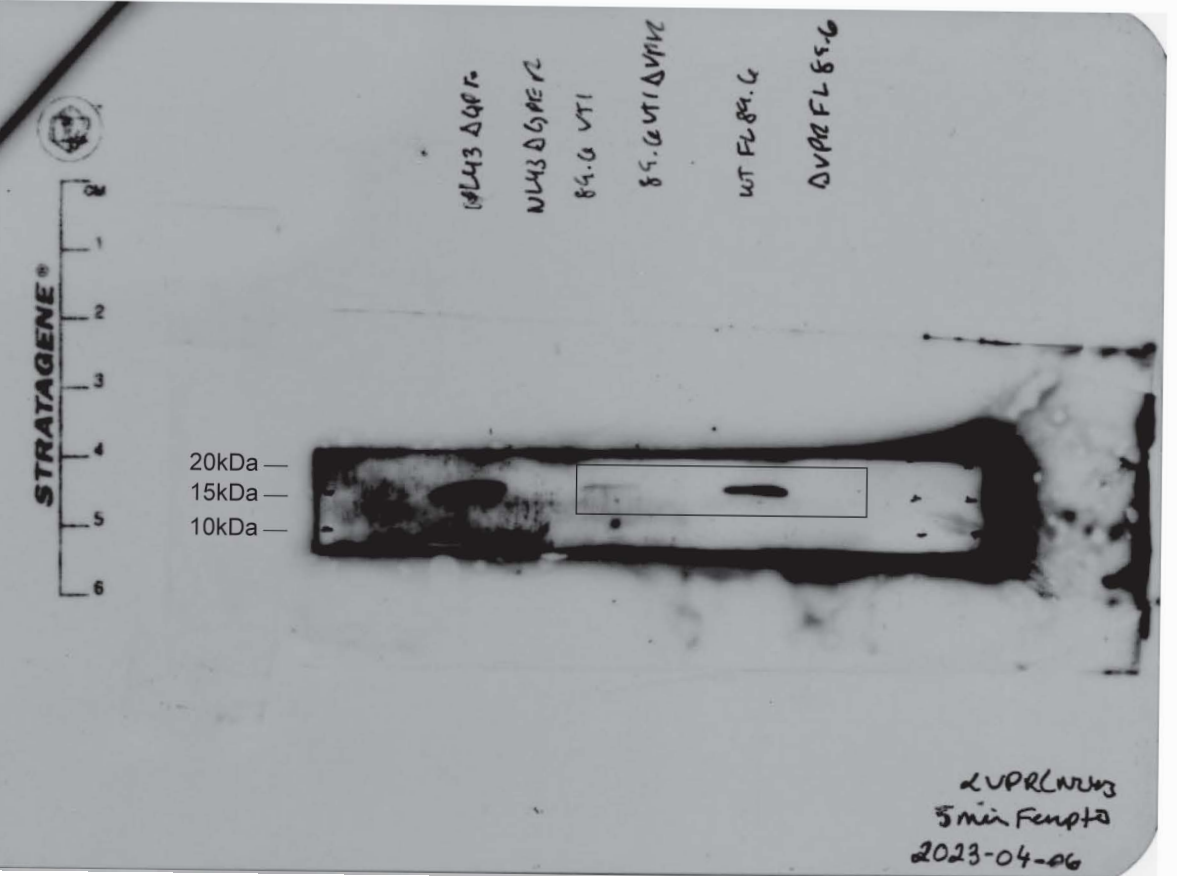

α-Vpr

Supplemental Figure 7C  
Uncropped western blot

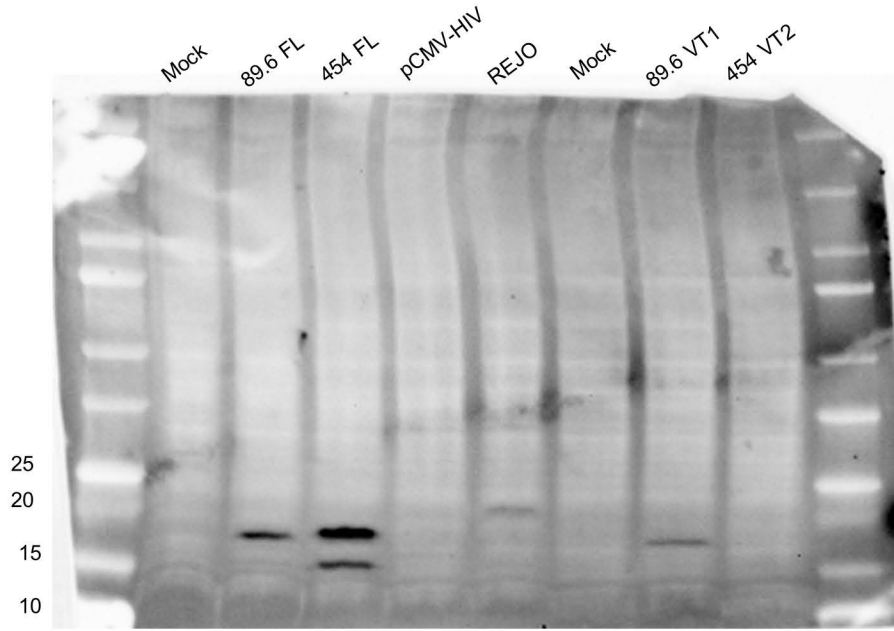

Thermo Tat Antibody 1:500

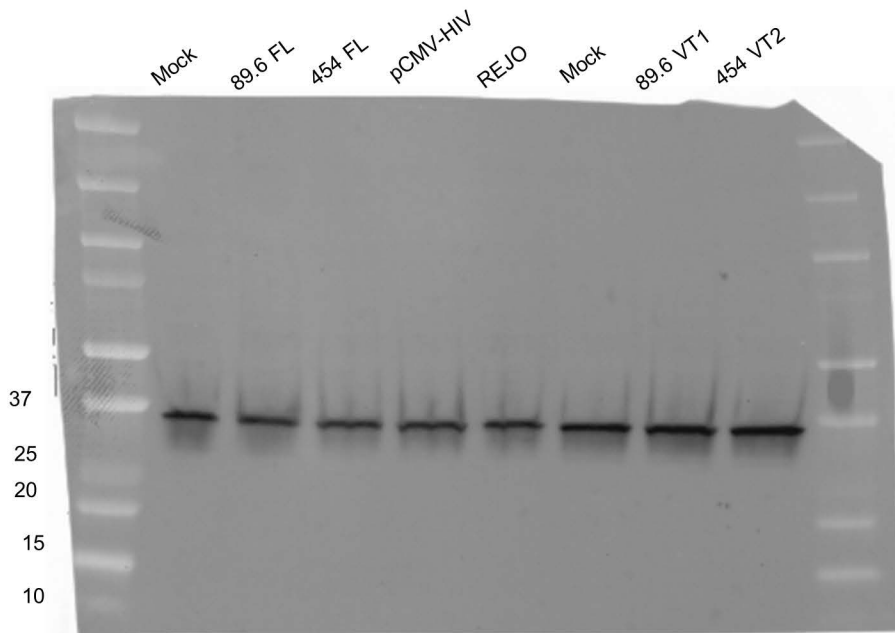

GAPDH
